# Supplementary material
Source: PubMed Central journal article supplement (PMC4554539)
Supplement: NIHMS694864-supplement-1.pdf [file NIHMS694864-supplement-1.pdf]

## SUPPLEMENTARY MATERIALS

### Interleukin 18 function requires both interleukin 18 receptor and Na-Cl co-transporter

Jing Wang,<sup>1,2\*</sup> Chongxiu Sun,<sup>1\*</sup> Norbert Gerdes,<sup>1,3</sup> Conglin Liu,<sup>1,4</sup> Mengyang Liao,<sup>1,5</sup> Jian Liu,<sup>1</sup> Michael A. Shi,<sup>1</sup> Aina He,<sup>1</sup> Yi Zhou,<sup>1</sup> Galina K. Sukhova,<sup>1</sup> Huimei Chen,<sup>1</sup> Xianwu Cheng,<sup>6</sup> Masafumi Kuzuya,<sup>6</sup> Toyoaki Murohara,<sup>6</sup> Jie Zhang,<sup>1</sup> Xiang Cheng,<sup>1,5</sup> Mengmeng Jiang,<sup>7</sup> Gary E. Shull,<sup>7</sup> Shaunessy Rogers,<sup>8</sup> Chao-Ling Yang,<sup>8</sup> Qiang Ke,<sup>1</sup> Sabina Jelen,<sup>9</sup> René Bindels,<sup>9</sup> David H. Ellison,<sup>8</sup> Petr Jarolim,<sup>10</sup> Peter Libby,<sup>1</sup> and Guo-Ping Shi<sup>1</sup>

1. Department of Medicine, Brigham and Women's Hospital and Harvard Medical School, Boston, MA 02115, USA
2. State Key Laboratory of Medical Molecular Biology, Institute of Basic Medical Sciences, Chinese Academy of Medical Sciences, Department of Pathophysiology, Peking Union Medical College, Tsinghua University, Beijing 100005, China
3. Institute for Cardiovascular Prevention (IPEK), Ludwig-Maximilians University Munich, Pettenkoflerstrasse 9, 80336 Munich, Germany
4. Department of Cardiology, Institute of Clinical Medicine, the First Affiliated Hospital of Zhengzhou University, Zhengzhou, China
5. Institute of Cardiology, Union Hospital, Tongji Medical College of Huazhong University of Science and Technology, Wuhan, China
6. Departments of Cardiology and Geriatrics, Graduate School of Medicine, Nagoya University, Japan
7. Department of Molecular Genetics, Biochemistry, and Microbiology, University of Cincinnati College of Medicine, Cincinnati, OH 45267, USA
8. Division of Nephrology and Hypertension, Oregon Health and Science University, and VA Medical Center, Portland, OR 97201, USA
9. Department of Physiology, Radboud University Nijmegen Medical Centre, 6500 HB Nijmegen, The Netherlands
10. Department of Pathology, Brigham and Women's Hospital and Harvard Medical School, Boston, MA 02115, USA

#### Corresponding Author:

Guo-Ping Shi, D.Sc.  
Cardiovascular Medicine  
77 Avenue Louis Pasteur, NRB-7  
Boston, MA 02115  
Email: [gshi@rics.bwh.harvard.edu](mailto:gshi@rics.bwh.harvard.edu)

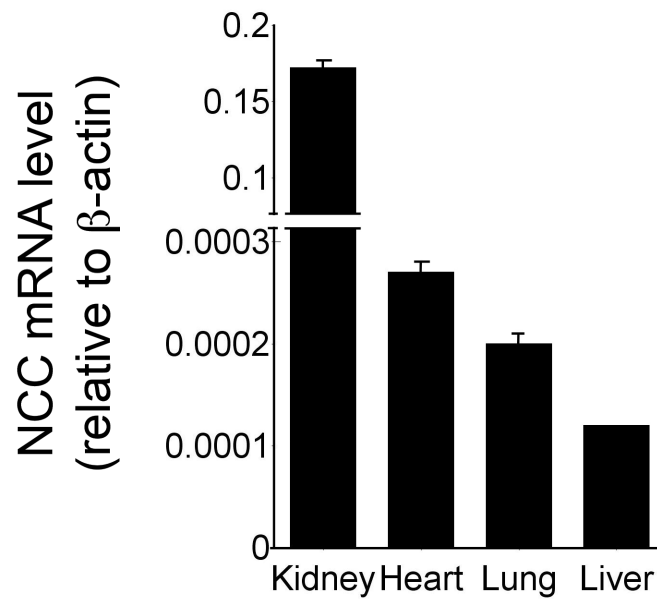

**Supplementary Figure 1.** RT-PCR to detect NCC mRNA levels in mouse kidney, heart, lung, and liver. Data are mean  $\pm$  SEM from three to six independent experiments.

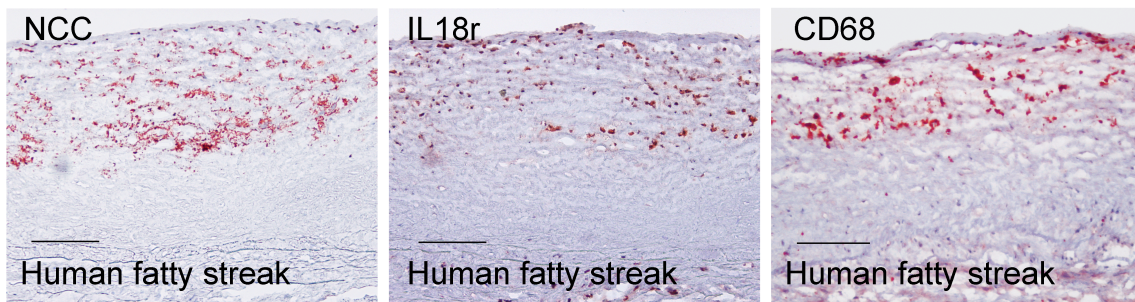

**Supplementary Figure 2.** Immunostaining of human carotid artery fatty streak frozen sections with antibodies against NCC (1:60, Millipore, Billerica, MA), IL18 receptor (1:100, R&D Systems, Minneapolis, MN), and CD68 (1:900, Dako, Carpinteria, CA). Bar: 200  $\mu$ m.

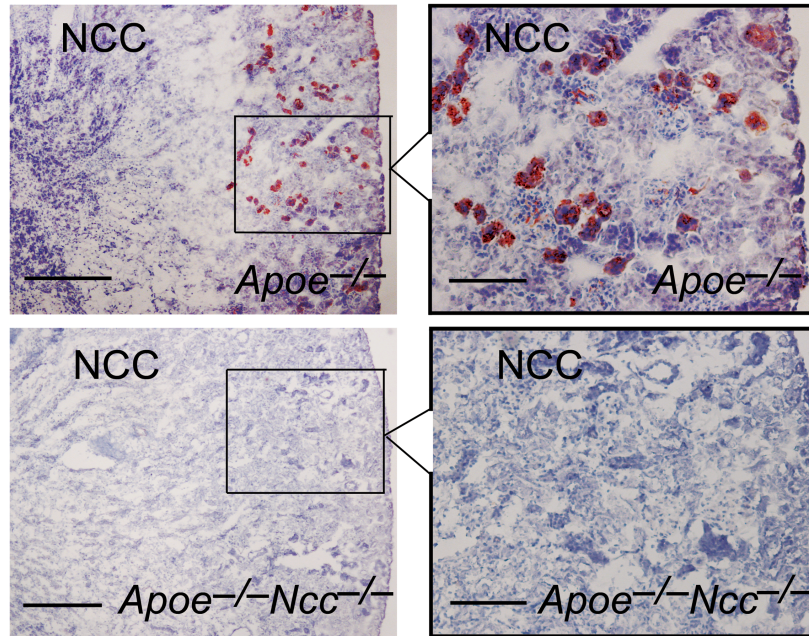

**Supplementary Figure 3.** Immunostaining of NCC on frozen kidney sections from *Apoe*<sup>-/-</sup> mice and *Apoe*<sup>-/-</sup>*Ncc*<sup>-/-</sup> mice with rabbit anti-NCC polyclonal antibody (1:60, Millipore, Billerica, MA). Anti-NCC antibody from our prior study (*J Am Soc Nephrol.* 1998;9:1347) yielded the exact same immunostaining pattern (data not shown). Bar: 500  $\mu$ m, Insert bar: 200  $\mu$ m.

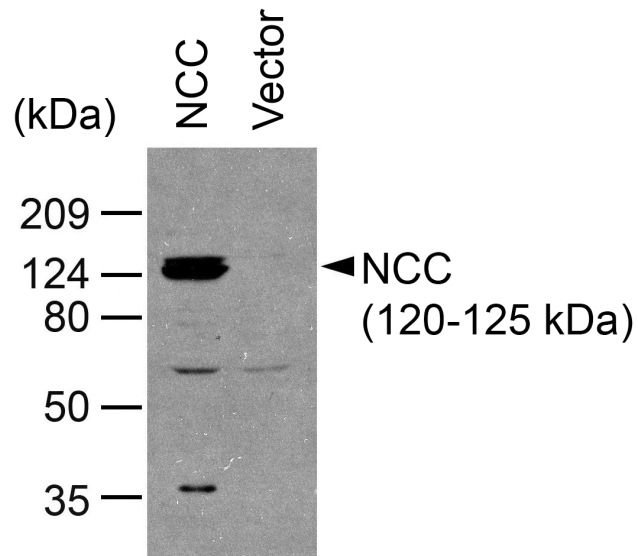

**Supplementary Figure 4.** Immunoblot analysis to detect NCC in NCC/pcDNA3.1- and pcDNA3.1-transfected COS-7 cells.

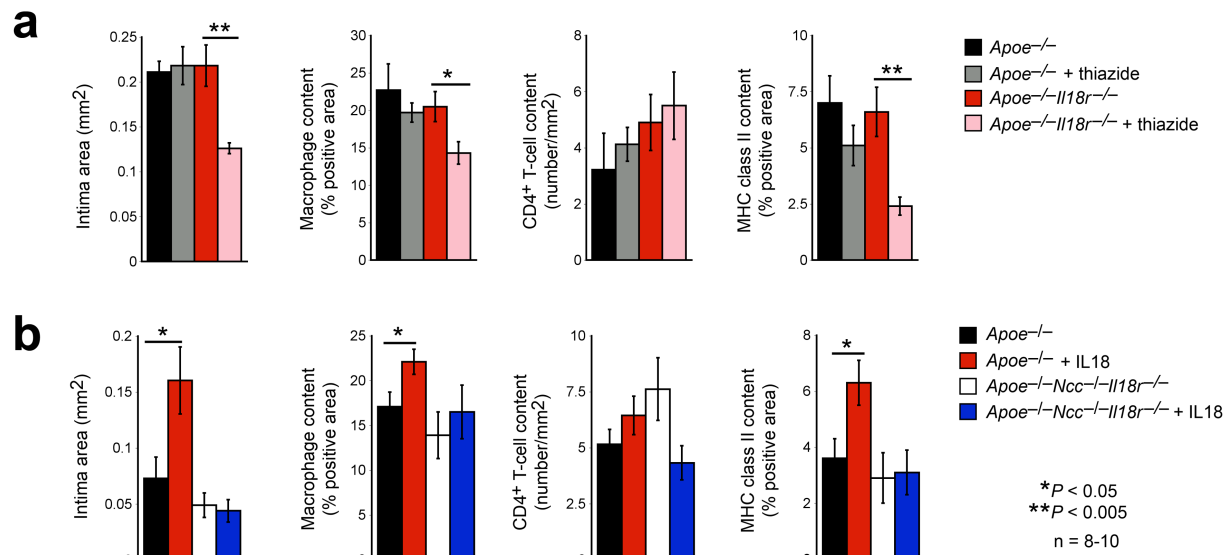

**Supplementary Figure 5.** Aortic root atherosclerotic lesion area, macrophage, CD4<sup>+</sup> T cell and MHC-II contents in mice treated with hydrochlorothiazide (3 months) (**a**) and mouse recombinant IL18 (4 weeks) (**b**) in different mice as indicated. Data are mean ± SEM, n=8-10 per experimental group.

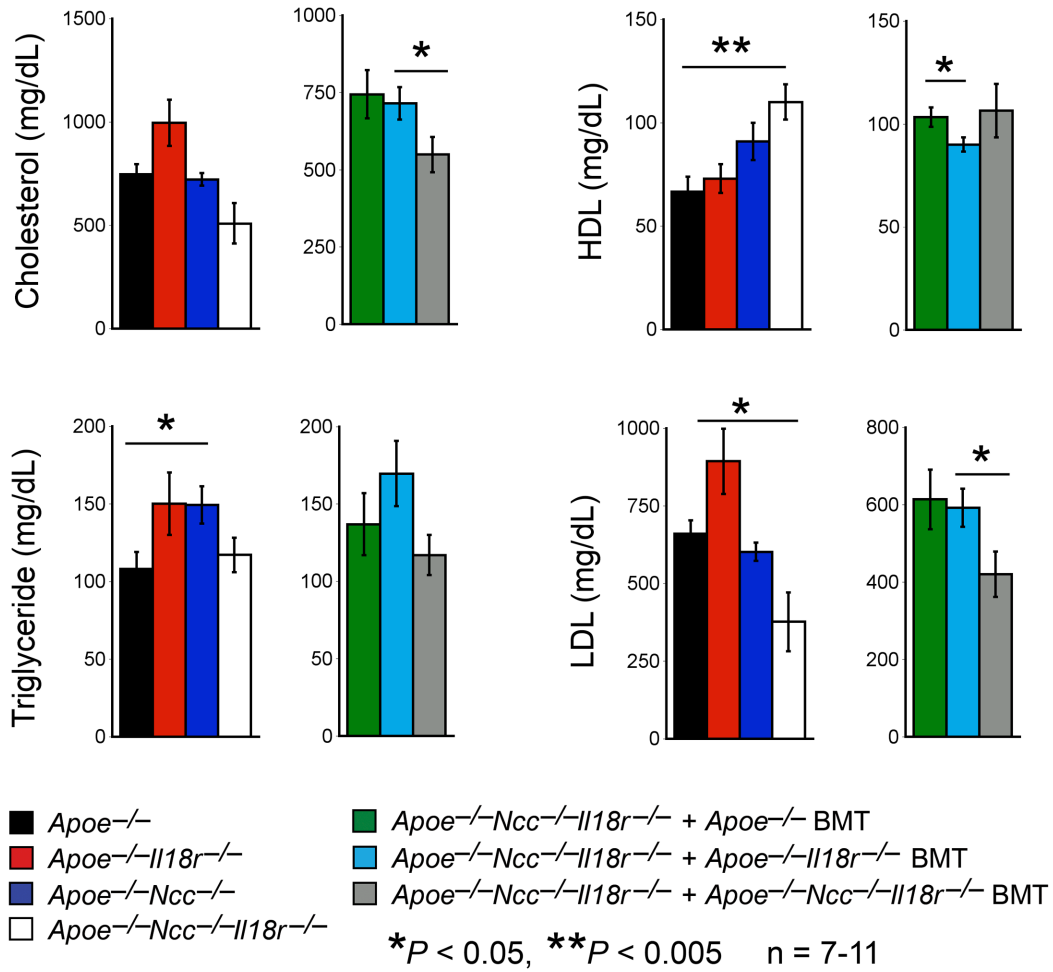

**Supplementary Figure 6.** Plasma levels of total cholesterol, HDL, triglyceride, and LDL from *Apoe*<sup>-/-</sup>, *Apoe*<sup>-/-</sup>*IL18r*<sup>-/-</sup>, *Apoe*<sup>-/-</sup>*Ncc*<sup>-/-</sup>, *Apoe*<sup>-/-</sup>*Ncc*<sup>-/-</sup>*IL18r*<sup>-/-</sup> mice, and *Apoe*<sup>-/-</sup>*Ncc*<sup>-/-</sup>*IL18r*<sup>-/-</sup> mice received BMT. Data are mean ± SEM, *n*=7-11 per experimental group.

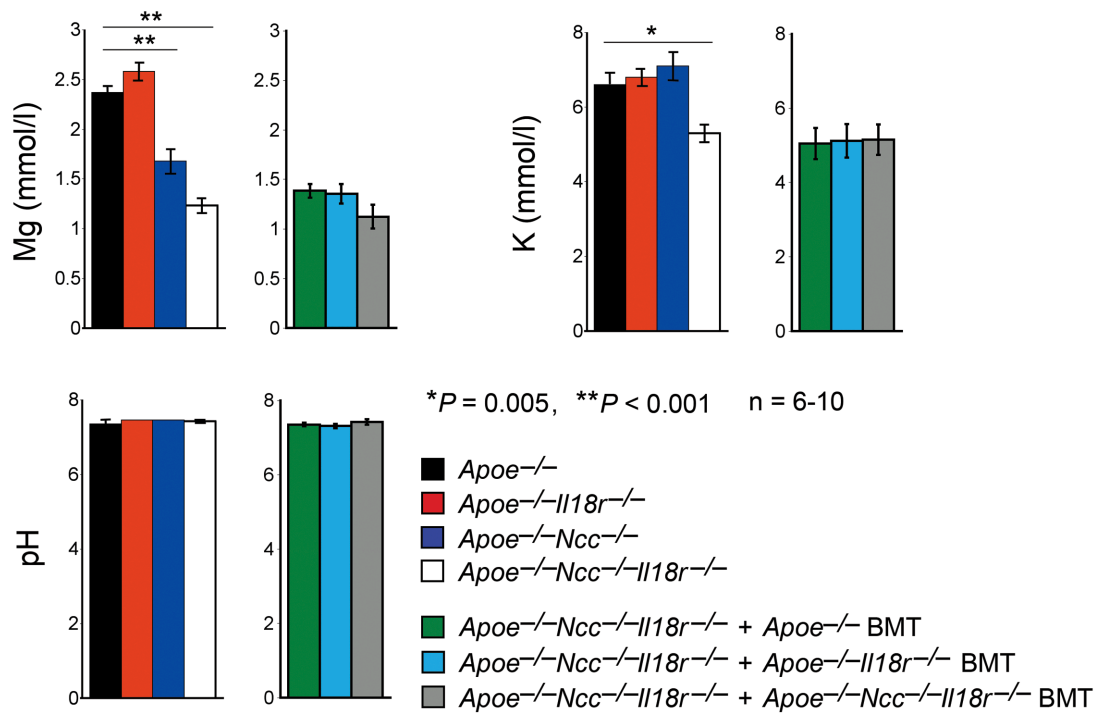

**Supplementary Figure 7.** Plasma levels of Mg<sup>2+</sup>, K<sup>+</sup>, and pH from *Apoe*<sup>-/-</sup>, *Apoe*<sup>-/-</sup>*Il18r*<sup>-/-</sup>, *Apoe*<sup>-/-</sup>*Ncc*<sup>-/-</sup>, *Apoe*<sup>-/-</sup>*Ncc*<sup>-/-</sup>*Il18r*<sup>-/-</sup> mice, and *Apoe*<sup>-/-</sup>*Ncc*<sup>-/-</sup>*Il18r*<sup>-/-</sup> mice received BMT. Data are mean ± SEM, n=6-10 per experimental group. Samples with gross hemolysis were excluded.

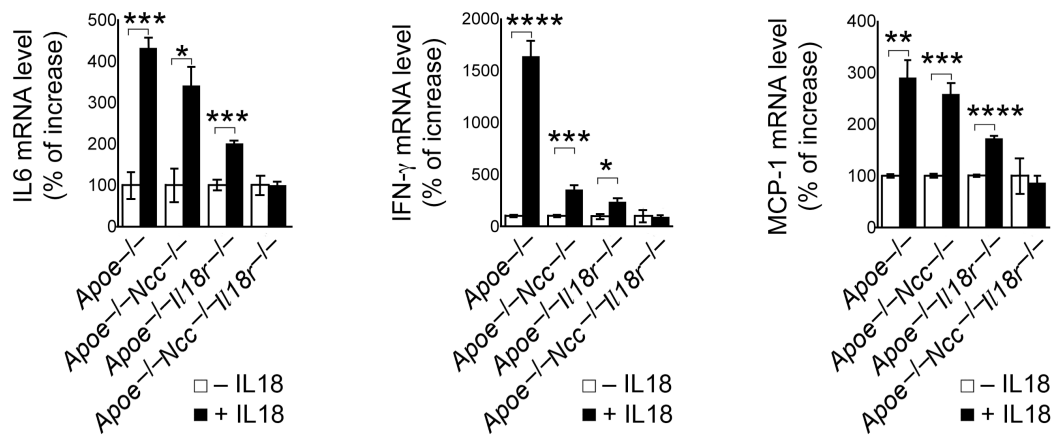

\* $P < 0.05$ , \*\* $P < 0.01$ , \*\*\* $P < 0.005$ , \*\*\*\* $P < 0.001$

**Supplementary Figure 8.** RT-PCR determined IL6, INF- $\gamma$ , and MCP-1 mRNA levels in IL18-treated and untreated macrophages from different mice, as indicated. Data are mean  $\pm$  SEM from three to six independent experiments.

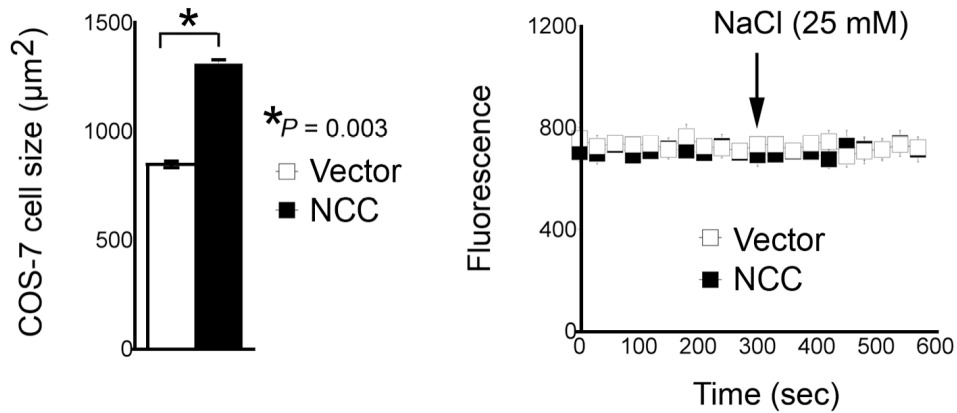

**Supplementary Figure 9.** Cell volume and intracellular Cl<sup>-</sup> concentrations in COS-7 cells transfected with NCC/pcDNA3.1 or vector alone. Data are mean  $\pm$  SEM from three to six independent experiments.

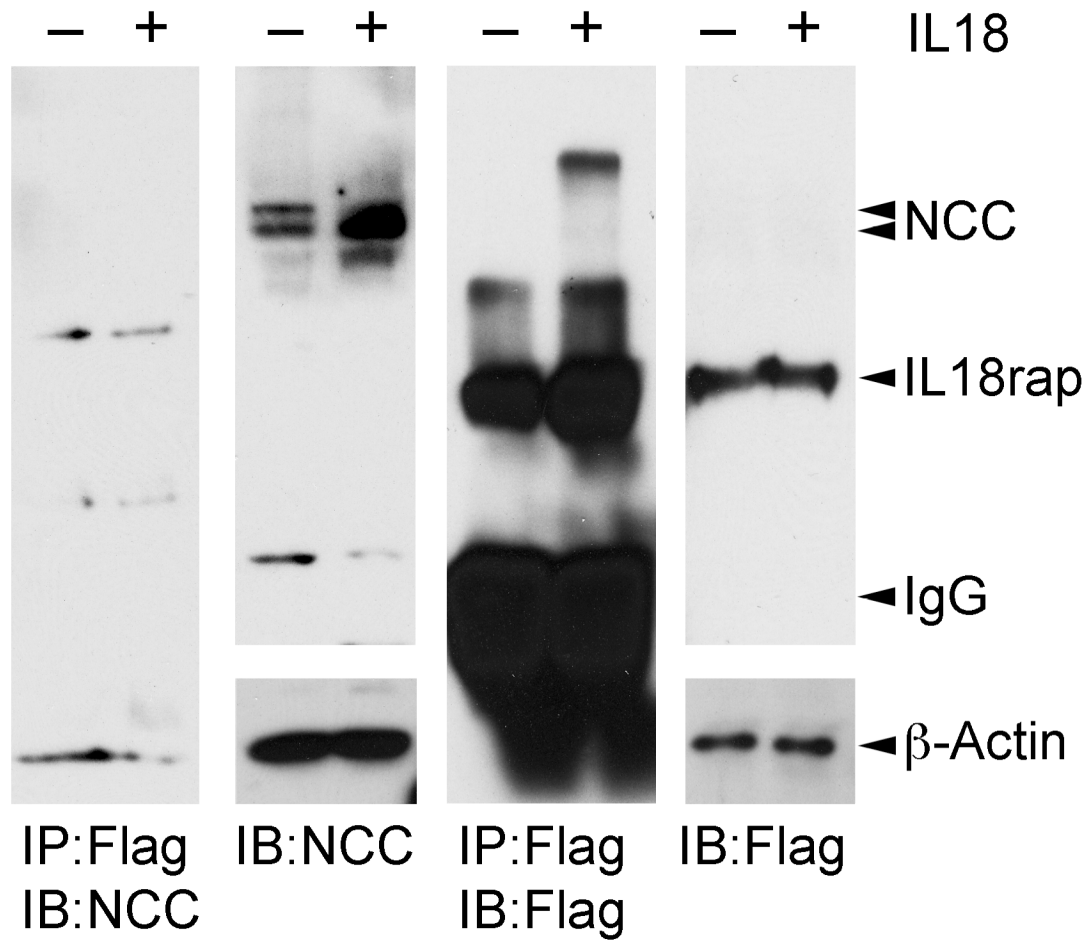

**Supplementary Figure 10.** NCC and IL18rap expression and co-immunoprecipitation from COS-7 cells. COS-7 cells were transfected with both NCC/pcDNA3.1 and Flag-IL18rap/pcDNA3.1. After 48 hours, cells were treated with or without IL18 for 15 minutes and then lysed in RIPA buffer and immunoprecipitated with anti-Flag antibody, followed by immunoblot analysis with either rabbit anti-mouse NCC polyclonal antibody (panel 1) or anti-Flag antibody (panel 3). The same cell lysates were used for immunoblot analysis to detect NCC (panel 2) and Flag-IL18rap (panel 4) expressions. Actin blots in panels 2 and 4 were used to ensure equal protein loading. IP: immunoprecipitation; IB: immunoblot.
